# Supplementary material
Source: MDPI journal article supplement (https://www.mdpi.com/1999-4907/11/9/938)
Supplement: s1 [file s1]

Archive with 3 entries (3 files):
- Supplementary_marerial1_quoted_survey_data.xlsx
- Supplementary_material2_Survey_questions.pdf
- Survey_Introductory_page.png
