# Supplementary material
Source: MDPI journal article supplement (https://www.mdpi.com/1999-4907/11/9/938)
Supplement: s1 [file s1 › Supplementary_marerial1_quoted_survey_data.xlsx]

## Sheet: Description
The data contained here incudes the information provided by the respondants that were cited in the manuscript. Besides the comments to which many of the citations refer general information that was requested in the survey is also inculuded to provide the necessary context of the response. Note: This data should be handled with confidentiallity until publication.

## Sheet: Quoted_response_data
		Reason for initiation			Conditions at forest(-landscape) level) decisive for initiation of measures										Activities											Location		Environment				Management						Ownership				Management restrictions						promoted species
ID	Type	Climate change	Societal change	Other	Degraded forest land should be restored	The forest was, or was likely to become, unprofitable	The forest lost, or was likely to lose, important ecosystem services	The forest lost, or was likely to lose its role in supporting local livelihoods	The forest lost, or was likely to lose its role in providing food security for local communities	The forest was increasingly prone to fire	The forest was increasingly prone to disease	The forest plays an important role for nature-/biodiversity conservation	The societal needs regarding the use of the forest have shifted	Other	Restoration of degraded forest lands	Forest conversion (e.g. changing tree species composition)	Change of the thinning regime	Variation of rotation period	Site preparation activities	Irrigation	Fire Management	Specific tree establishment methods (e.g. use of containerized seedlings)	Assisting species migration and gene flow of tree species	Preserving / increasing (tree-) species and provenance diversity	Other	Country	Region	Climatic conditions of the region	Predominant vegetation type of the region	Terrain type	Elevation [m above sea level]	Current management regime	Current management - Other	Former/historic management regime	Former/historic management - Other	Until what year was the former management in place?	For how long was the former management in place?	Who owns the forest?	Who owns the forest? - Other	Who decides about the management?	Who decides about the management? - Other	No restrictions	Legal restrictions	Technical restrictions	Economic restrictions	Other	Description of the management restrictions	Local provenances of native tree species	Non-local provenances of native tree species
145	FLR	No	No	forest restoration on highly disturbed sites	Yes	No	Yes	No	No	No	No	Yes	No		Yes	No	No	No	No	No	No	Yes	No	Yes		Canada	Maritime Provinces	Temperate	Temperate broadleaf and mixed forests (temperate, humid)	Hilly	100m	Other	former coal mining region	Other	former coal mining region	2010	100	owned and managed by the state / public bodies (or without management)		State authorities		Yes	No	No	No			No	Yes
147	AFM	Yes	No	Owner's desire to create a more diverse forest in terms of structure	No	Yes	Yes	No	No	No	No	No	No		No	Yes	Yes	Yes	No	No	No	No	No	Yes	Move away from clear-felling towards continuous cover forestry	United Kingdom	Nottinghamshire	Temperate	Temperate broadleaf and mixed forests (temperate, humid)	Flat	80	Medium intensity (Combined use approaches with timber production + other management goals like water protection, recreation, erosion control. Mixed forest)		High intensity (Timber production oriented approach, few or single species, intensive harvesting operations, planting of trees etc.)		2005	100	owned by individuals / private bodies		Owners		No	Yes	No	No		Management actions (e.g. thinning and felling) have to be approved by the State Forest service	Yes	Yes
151	combination	Yes	No		Yes	No	Yes	No	No	No	No	Yes	No	the local target species is under extinction danger	Yes	No	No	No	Yes	No	No	No	Yes	No		Italy	Sicily	Temperate	Temperate broadleaf and mixed forests (temperate, humid)	Mountainous	1800	Unmanaged, unutilized (e.g. nature conservation)		High intensity (Timber production oriented approach, few or single species, intensive harvesting operations, planting of trees etc.)		1960	1000	owned and managed by the state / public bodies (or without management)		Other	Regional Natural Park of Madonie range	No	Yes	Yes	No	High degradation of the habitat	Restrictions due to the very high degradation level of the whole Fagus/Abies ecosystem with introgression of evergreen and deciduous oaks at lower altitude. Grazing and intense coppice cuts in the past discovered rocks and degraded soils. Coppice must now stay without treatments until a major stature has been reached. Any action must be very slow and soft. The are where the target species occurs …	Yes	No
166	combination	Yes	Yes	socio-ecological change	Yes	No	Yes	No	Yes	No	No	Yes	No	the continuous changes in the use of the land have generated serious transformations of the structure and functioning of the Amazonian ecosystems	Yes	Yes	No	No	No	No	No	Yes	No	No	i) the rehabilitation of degraded areas with agroforestry systems, ii) passive restoration avoiding slash and burn of new forest areas, iii) improved fallows, increasing the planting density of agroforestry species	Venezuela	Amazonas	Tropical/subtropical seasonal (wet and dry)	Tropical and subtropical moist broadleaf forests (tropical and subtropical, humid)	Flat	100	Agroforestry		Low intensity (close to nature forestry, low impact logging, native species)		2009	40	owned by local communities		There is no management		No	No	Yes	Yes	participatory management to improve forest management processes	Undoubtedly, the focus of this long-term project, largely includes the focal and thematic areas, also monitored by the Small Grants Program (PPD / GEF / GEF). Therefore, agroforestry is an alternative for the sustainable management of forests, conserving agrobiodiversity in productive landscapes, contributing to the food sovereignty of families at local and regional levels, adapting communities t…	Yes	Yes
200	combination	Yes	No	Storm Damage	No	No	Yes	No	No	No	Yes	Yes	No		Yes	Yes	No	No	Yes	No	No	Yes	No	Yes		Deutschland	Nordrhein-Westfalen	Temperate	Temperate broadleaf and mixed forests (temperate, humid)	Hilly	250	Medium intensity (Combined use approaches with timber production + other management goals like water protection, recreation, erosion control. Mixed forest)		Medium intensity (Combined use approaches with timber production + other management goals like water protection, recreation, erosioncontrol. Mixed forest )				owned and managed by the state / public bodies (or without management)		State authorities		Yes	No	No	No			Yes	Yes
209	AFM	Yes	No		No	No	Yes	No	No	Yes	Yes	No	No		No	Yes	Yes	Yes	No	No	No	No	No	No		Germany	Brandenburg	Temperate	Temperate coniferous forests (temperate, humid to semihumid)	Flat	80	Medium intensity (Combined use approaches with timber production + other management goals like water protection, recreation, erosion control. Mixed forest)		Medium intensity (Combined use approaches with timber production + other management goals like water protection, recreation, erosioncontrol. Mixed forest )		2000	50	owned by the state but some ownership rights (e.g. access, management, exclusion) are exercised by local communities		Joint management		No	No	No	Yes		Changed Management would require more manpower in the forests which is supported financially by the state forest enterprise	Yes	No
240	AFM	Yes	No		No	No	Yes	No	No	Yes	Yes	No	No		No	No	No	Yes	Yes	Yes	Yes	No	No	Yes		Portugal	Alentejo	Temperate	Mediterranean forests, woodlands and scrub or sclerophyll forests (temperate warm, semihumid to semiarid with winter rainfall)	Hilly	300	High intensity (Timber production oriented approach, few or single species, intensive harvesting operations, planting of trees etc.)		Unmanged, unutilized (e.g. nature conservation)				owned by individuals / private bodies		Owners		No	Yes	Yes	Yes		Legal restrictions supported by biased "Environmental" arguments cause lost of economically viability and return to unmanaged forest which is more vulnerable to wild fires and diseases	No	Yes
246	combination	No	Yes		Yes	No	Yes	Yes	No	No	No	No	No		No	No	No	No	No	No	No	Yes	No	Yes		Ecuador	south Andes	Tropical/subtropical seasonal (wet and dry)	Mediterranean forests, woodlands and scrub or sclerophyll forests (temperate warm, semihumid to semiarid with winter rainfall)	Mountainous	2600	Unmanaged, unutilized (e.g. nature conservation)		Very intensive management (short rotation, even aged, single species, clearcut; e.g. plantation forestry)		1990	30	owned by local communities		Local stakeholder communities		No	No	Yes	Yes		Local stakeholders are not willing to invest time and other resources in managing/recovering degraded areas Access to these areas is difficult and those transportation and implementation costs increase	Yes	No
344	AFM	No	Yes		Yes	No	Yes	No	Yes	Yes	No	Yes	Yes		No	Yes	No	No	No	Yes	Yes	Yes	Yes	No		India	Buxa Tiger Reserve, Sub-division of Alipurduar, West Bengal	Tropical/subtropical seasonal (wet and dry)	Tropical and subtropical moist broadleaf forests (tropical and subtropical, humid)	Hilly	100 - 150 approx	Agroforestry		Agroforestry		1990	20	owned and managed by the state / public bodies (or without management)		State authorities		No	Yes	Yes	Yes		There is a conflict of interest between the Forest authorities and tribal communities living inside as well as in the buffer zones as to the entry and use of forest products in the cire area of the forest. Many instances of illegal entry by the locals in the forest area is also a problem faced by the forest department.	Yes	No
385	AFM	Yes	No	Economy	No	Yes	No	No	No	No	Yes	No	No		No	Yes	No	Yes	No	No	No	No	No	No		Deutschland	Baden-Württemberg	Temperate	Temperate broadleaf and mixed forests (temperate, humid)	Hilly	600	Medium intensity (Combined use approaches with timber production + other management goals like water protection, recreation, erosion control. Mixed forest)		High intensity (Timber production oriented approach, few or single species, intensive harvesting operations, planting of trees etc.)		1970	200	owned and managed by the state / public bodies (or without management)		Owners		No	Yes	No	Yes		Legal Guidlines (Sustainability, Carfulness) Timber harvesting must be economically viable (extensive cultivation in difficult terrain situations such as steep slopes)	Yes	No
387	FLR	No	Yes	Deforestation of native forests	Yes	Yes	Yes	Yes	Yes	Yes	No	Yes	Yes		Yes	No	No	No	Yes	No	Yes	No	No	No		Angola	Bengo	Tropical/subtropical seasonal (wet and dry)	Tropical and subtropical dry broadleaf forests (tropical and subtropical, semihumid)	Hilly	100	Medium intensity (Combined use approaches with timber production + other management goals like water protection, recreation, erosion control. Mixed forest)		Unmanaged, utilized (e.g. fuel wood, Non-Timber Forest Products extraction)		2010	40	owned by the state but some ownership rights (e.g. access, management, exclusion) are exercised by local communities		Joint management		No	No	Yes	No	Forest restoration with native high value timber species is restricted by low seedling supply of native species and high mortality of planted seedlings		Yes	No
394	FLR	No	No	sustainable income generation, rural dev.	Yes	No	Yes	Yes	Yes	Yes	No	Yes	Yes		Yes	No	No	No	Yes	Yes	Yes	No	No	Yes		Indonesia	Central Kalimantan	(Sub-)Tropical wet	Tropical and subtropical moist broadleaf forests (tropical and subtropical, humid)	Hilly	25-160	High intensity (Timber production oriented approach, few or single species, intensive harvesting operations, planting of trees etc.)		Other	High-intensity unsustainble logging practices	1990	25	owned and managed by the state / public bodies (or without management)		Local stakeholder communities		No	Yes	No	Yes	Social (farmer groups), mind shift towards sustainable and long term land-use	The FLR project area was formerly covered by logging concessions issued by the state initially in the 1970s. Unsustainable commercial logging activities have been conducted during a concession period of 25 years, leaving the forest severely degraded and prone to fire and smallholder clearing. Hence, soils are extremely degraded and require additional amelioration measures and smallholders require…	No	Yes
441	combination	No	Yes		No	No	No	No	No	No	No	No	Yes	forest plantation on arable land	Yes	Yes	No	No	No	No	No	No	No	No		Sweden	Skåne	Temperate	Temperate broadleaf and mixed forests (temperate, humid)	Flat	50	High intensity (Timber production oriented approach, few or single species, intensive harvesting operations, planting of trees etc.)		High intensity (Timber production oriented approach, few or single species, intensive harvesting operations, planting of trees etc.)		1990	150	owned by individuals / private bodies		Owners		No	Yes	No	No		Swedish Forest Act has to be followed.	No	Yes
465	AFM	No	Yes		No	No	Yes	No	No	No	No	No	Yes		No	No	Yes	Yes	No	No	No	No	No	No		Sweden	GÃ¶taland	Temperate	Temperate coniferous forests (temperate, humid to semihumid)	Hilly	200	High intensity (Timber production oriented approach, few or single species, intensive harvesting operations, planting of trees etc.)		High intensity (Timber production oriented approach, few or single species, intensive harvesting operations, planting of trees etc.)		2017	100	owned by individuals / private bodies		Owners		No	Yes	No	No		Plantations of native tree species and homogeneous types of stand structure prevail	Yes	No
524	FLR	No	No	Water security	Yes	No	Yes	No	No	No	No	Yes	No		Yes	No	No	No	No	No	No	No	No	No		Brazil	Atlantic Forest	Tropical/subtropical seasonal (wet and dry)	Tropical and subtropical moist broadleaf forests (tropical and subtropical, humid)	Mountainous	1500	Unmanaged, unutilized (e.g. nature conservation)		Other	Deforested for pastureland	2009	20	owned by individuals / private bodies		Owners		No	Yes	No	Yes		Brazilian Forest Code states that areas in steep slopes can't be deforested and, if that occurred they must be restored. However, land owners in general don't comply with the low in part due to the costs of restoration.	Yes	No
529	FLR	No	No	Restoration experiment in degraded former pine plantations	Yes	Yes	Yes	Yes	Yes	Yes	No	No	No	The forest was illegally harvested and afterwards invaded by weeds. Regular occurance of fire	Yes	No	No	No	No	No	Yes	No	No	No	Fencing to allow natural regeneration of native forest remnants from the surrounding area	Malawi	Mzuzu	Tropical/subtropical seasonal (wet and dry)	Tropical and subtropical grasslands, savannas and shrublands (tropical and subtropical, semiarid)	Hilly	1200	Unmanaged, utilized (e.g. fuel wood, Non-Timber Forest Products extraction)		High intensity (Timber production oriented approach, few or single species, intensive harvesting operations, planting of trees etc.)		1990	30	owned by the state / public bodies but managed by private companies		Other	Licensed loggers. But also illegal activities by local and external groups	No	Yes	No	No		Use of plantations is licensed to small and large logging companies and use by unlicensed groups is illegal but occurring	Yes	No
534	combination	Yes	Yes		No	Yes	Yes	Yes	No	Yes	Yes	Yes	Yes		Yes	Yes	Yes	Yes	Yes	No	No	Yes	Yes	Yes		Deutschland	Breisgau	Temperate	Temperate broadleaf and mixed forests (temperate, humid)	Hilly	500	Low intensity (close to nature forestry, low impact logging, native species)		High intensity (Timber production oriented approach, few or single species, intensive harvesting operations, planting of trees etc.)		1980	100	owned by the state but some ownership rights (e.g. access, management, exclusion) are exercised by local communities		State authorities		No	Yes	No	No		Der Wald ist FSC zertifiziert und ferner nach Vorgabe von Bundes- und Landeswaldgesetz nachhaltig zu bewirtschaften. Für die Bewirtschaftung bedeutet dies zB. den Verzicht auf Kahlschläge, Befahrung der Bestände nur auf Rückegassen etc.	Yes	Yes
549	combination	No	Yes		Yes	No	Yes	No	No	No	No	Yes	Yes		No	Yes	No	No	No	No	No	No	No	Yes		Guatemala	Lower Humid Lowlands in south and north sides of the country	Tropical/subtropical seasonal (wet and dry)	Tropical and subtropical moist broadleaf forests (tropical and subtropical, humid)	Hilly	0-1000	Medium intensity (Combined use approaches with timber production + other management goals like water protection, recreation, erosion control. Mixed forest)		Low intensity (close to nature forestry, low impact logging, native species)		1997	21	owned by individuals / private bodies		Joint management		No	Yes	No	Yes	ecological knowledge of native species is poorly understood	Deforestation continues to be a problem at country level in Guatemala. Different policy tools are in place, most relevant a National Forest Incentives intended to promote industrial plantations and sustainable management of remaining natural forests, especially those intended for upper watersheds protection and fuelwood production in the highlands. There is a trend to promote more sustainable lan…	Yes	No
554	FLR	Yes	No	Ecological and Environmental Compensation	Yes	No	Yes	No	Yes	No	No	Yes	No		Yes	Yes	No	No	Yes	No	Yes	Yes	Yes	Yes		Colombia	Huila	Tropical/subtropical seasonal (wet and dry)	Tropical and subtropical dry broadleaf forests (tropical and subtropical, semihumid)	Hilly	700-1200 msnm	Unmanaged, unutilized (e.g. nature conservation)		Medium intensity (Combined use approaches with timber production + other management goals like water protection, recreation, erosioncontrol. Mixed forest )		2009	50	owned by individuals / private bodies		State authorities		No	Yes	Yes	Yes		It is an environmental compensation area that should be restored as a conservation area and later declared a protected area.	Yes	Yes
558	FLR	No	No	Erosion of cattle grazing lands	Yes	No	Yes	Yes	No	Yes	No	Yes	No	Grassland erosion, unproductive grazing land	Yes	No	No	No	No	No	No	Yes	No	No		Colombia	Sierra Nevada de Santa Marta	Tropical/subtropical seasonal (wet and dry)	Tropical and subtropical moist broadleaf forests (tropical and subtropical, humid)	Mountainous	1500	Low intensity (close to nature forestry, low impact logging, native species)		Other	Grazing	2010	20	owned and managed by the state / public bodies (or without management)		State authorities		Yes	No	No	No			Yes	No
575	AFM	Yes	No	sustainable and near natural forest management	No	No	No	No	No	No	No	Yes	No	The forest habitat types should be be conserved and developed in sustainale way	No	Yes	Yes	Yes	No	No	Yes	Yes	No	Yes	natural regenetation of forests, small-scale and unevenaged forest management systems, planting / introduction / of native or site adapted tree species, maintaining of health and vitality of forests, etc.	Slovenia	Slovenia	Temperate	Temperate broadleaf and mixed forests (temperate, humid)	Mountainous	100-1500	Medium intensity (Combined use approaches with timber production + other management goals like water protection, recreation, erosion control. Mixed forest)		Low intensity (close to nature forestry, low impact logging, native species)		2013	60	Other	private (75%) and state/publicly owned (25%) forests and management	Owners		No	Yes	Yes	No	special forest management and conservation regimes	Legal and technical restrictions: 1) forest management plan, to be drafted by the state forest service, oblihatory also for private forests (for holdings within certain forest sub-compartments); 2) permission for cutting needed, along with individual marking of trees before felling, to be issued and/or carried out by the state forestry service; 3) clear cutting (over 0.15 hectares) forbidden unle…	Yes	No
589	FLR	No	Yes	Awareness of the connection between deforestation/ forest degradation and erosion as well as flood damage	Yes	No	Yes	No	No	Yes	No	No	No		Yes	No	No	No	No	No	Yes	No	No	No		Malawi	Nkhata Bay	Tropical/subtropical seasonal (wet and dry)	Tropical and subtropical dry broadleaf forests (tropical and subtropical, semihumid)	Hilly	500	Unmanaged, utilized (e.g. fuel wood, Non-Timber Forest Products extraction)		Unmanaged, utilized (e.g. fuel wood, Non-Timber Forest Products extraction)		2005	200	Other	Ownership is disputed	Local stakeholder communities		Yes	No	No	No			No	No
595	FLR	No	Yes		No	No	Yes	No	No	No	No	Yes	Yes		Yes	No	No	No	No	No	No	No	No	No		Costa Rica	Guanacaste Province	Tropical/subtropical seasonal (wet and dry)	Tropical and subtropical dry broadleaf forests (tropical and subtropical, semihumid)	Hilly	50 - 800	Unmanaged, unutilized (e.g. nature conservation)		Other	Agriculture	1990	90	owned by the state but some ownership rights (e.g. access, management, exclusion) are exercised by local communities		Local stakeholder communities		No	Yes	No	No		Many forest areas in the regions have been declared as protected areas	Yes	No
599	FLR	No	No	desertification	No	No	Yes	Yes	No	No	No	No	No	Desertification	Yes	No	No	No	Yes	Yes	No	Yes	Yes	Yes		Nigeria	Borno	Arid (dry, no distinct wet season)	Tropical and subtropical grasslands, savannas and shrublands (tropical and subtropical, semiarid)	Flat	290	Unmanaged, utilized (e.g. fuel wood, Non-Timber Forest Products extraction)		Unmanaged, utilized (e.g. fuel wood, Non-Timber Forest Products extraction)		2000	50	owned by the state but some ownership rights (e.g. access, management, exclusion) are exercised by local communities		There is no management		Yes	No	No	No			Yes	Yes
613	combination	No	No	Need to change species composition	No	No	No	No	No	Yes	Yes	Yes	No	timber was sustainably harvest to provide permanent endowment revenue stream for schools and other institutions	No	Yes	No	Yes	Yes	No	Yes	Yes	No	Yes		United States of America	Pacific Northwest (Idaho)	Temperate	Temperate coniferous forests (temperate, humid to semihumid)	Mountainous	1100	High intensity (Timber production oriented approach, few or single species, intensive harvesting operations, planting of trees etc.)		Very intensive management (short rotation, even aged, single species, clearcut; e.g. plantation forestry)		1960	30	owned and managed by the state / public bodies (or without management)		State authorities		No	Yes	Yes	Yes		Decisions concerning management must ensure that lands are managed sustainably for long term revenue streams to state institutions. Failure to manage sustainably would result in loss of revenue to beneficiaries and diminish associated ecosystem services associated with a managed working forest.	Yes	No
645	combination	Yes	No		Yes	Yes	No	No	No	No	Yes	Yes	No		Yes	Yes	No	No	Yes	No	No	Yes	Yes	Yes		Netherlands	all	Temperate	Temperate coniferous forests (temperate, humid to semihumid)	Flat	20	Medium intensity (Combined use approaches with timber production + other management goals like water protection, recreation, erosion control. Mixed forest)		Low intensity (close to nature forestry, low impact logging, native species)		2010	30	Other	variety of owners: public, county, nature conservation organisations and private	Owners		No	No	No	No	there are not many restrictions, but th eowener has to assue sustainabel management. in areas with more attention for nature, there are more felling restrictions. e.g. no fellings in summer period. Habitat check before fellings, etc.		No	Yes
666	FLR	Yes	Yes		No	No	Yes	Yes	Yes	No	No	No	Yes		Yes	No	No	No	No	No	No	No	No	Yes		Tanzania	Shinyanga	Tropical/subtropical seasonal (wet and dry)	Tropical and subtropical dry broadleaf forests (tropical and subtropical, semihumid)	Hilly	1200	Agroforestry		Agroforestry				owned by the state but some ownership rights (e.g. access, management, exclusion) are exercised by local communities		Local stakeholder communities		Yes	No	No	No			Yes	Yes
667	FLR	No	Yes		Yes	No	Yes	No	No	No	No	Yes	No		Yes	No	No	No	No	No	No	No	No	Yes	exclusion of illegal logging, ban on charcoal production	Tanzania	Ruvu	Tropical/subtropical seasonal (wet and dry)	Tropical and subtropical dry broadleaf forests (tropical and subtropical, semihumid)	Flat	100	Low intensity (close to nature forestry, low impact logging, native species)		High intensity (Timber production oriented approach, few or single species, intensive harvesting operations, planting of trees etc.)		2005	50	owned by the state but some ownership rights (e.g. access, management, exclusion) are exercised by local communities		Local stakeholder communities		No	Yes	No	No		Illegal logging for timber and farming and charcoal production was outlawed	Yes	Yes
668	combination	Yes	No	Desertification	Yes	No	Yes	Yes	Yes	No	No	No	No		Yes	No	No	No	Yes	Yes	No	Yes	No	Yes		Mali	Mopti	Arid (dry, no distinct wet season)	Tropical and subtropical grasslands, savannas and shrublands (tropical and subtropical, semiarid)	Flat	300	Agroforestry		Unmanaged, utilized (e.g. fuel wood, Non-Timber Forest Products extraction)				owned by the state but some ownership rights (e.g. access, management, exclusion) are exercised by local communities		Local stakeholder communities		Yes	No	No	No			Yes	Yes
669	combination	Yes	No	Fight Deserticication	Yes	No	Yes	Yes	Yes	No	No	No	No		Yes	No	No	No	Yes	Yes	Yes	Yes	No	Yes		Burkina Faso	Sahel	Tropical/subtropical seasonal (wet and dry)	Tropical and subtropical grasslands, savannas and shrublands (tropical and subtropical, semiarid)	Flat	400	Agroforestry		Unmanaged, utilized (e.g. fuel wood, Non-Timber Forest Products extraction)				owned by the state but some ownership rights (e.g. access, management, exclusion) are exercised by local communities		Local stakeholder communities		No	No	No	No			Yes	Yes
670	combination	Yes	No	Deserticifation through Overexploitation	Yes	No	Yes	Yes	Yes	Yes	No	Yes	No		Yes	No	No	No	Yes	Yes	Yes	Yes	No	Yes		The Niger	Tillaberi	Tropical/subtropical seasonal (wet and dry)	Tropical and subtropical grasslands, savannas and shrublands (tropical and subtropical, semiarid)	Flat	350	Agroforestry		Unmanaged, utilized (e.g. fuel wood, Non-Timber Forest Products extraction)				owned by the state but some ownership rights (e.g. access, management, exclusion) are exercised by local communities		Local stakeholder communities		Yes	No	No	No			Yes	Yes
671	FLR	No	No	recultivation of barren lands	Yes	Yes	No	Yes	No	No	No	No	No	Establishment of forest plantations as part of rural development	No	No	No	No	Yes	Yes	Yes	Yes	No	No		Kenya	West	Tropical/subtropical seasonal (wet and dry)	Tropical and subtropical grasslands, savannas and shrublands (tropical and subtropical, semiarid)	Hilly	1500	High intensity (Timber production oriented approach, few or single species, intensive harvesting operations, planting of trees etc.)		Unmanaged, utilized (e.g. fuel wood, Non-Timber Forest Products extraction)		1980		owned and managed by the state / public bodies (or without management)		State authorities		Yes	No	No	No			No	No
673	combination	No	Yes		Yes	No	Yes	Yes	No	No	Yes	No	No		Yes	Yes	Yes	Yes	No	No	No	Yes	Yes	Yes		China	Yunnan	Tropical/subtropical seasonal (wet and dry)	Tropical and subtropical dry broadleaf forests (tropical and subtropical, semihumid)	Mountainous	1200	Medium intensity (Combined use approaches with timber production + other management goals like water protection, recreation, erosion control. Mixed forest)		Very intensive management (short rotation, even aged, single species, clearcut; e.g. plantation forestry)				owned and managed by the state / public bodies (or without management)		State authorities		No	No	No	No			Yes	Yes
691	FLR	Yes	No	Desertification caused by overexploitation of forest for fuel wood	Yes	No	Yes	Yes	Yes	No	No	No	No		Yes	No	No	No	Yes	Yes	No	Yes	No	No		Nigeria	Kano	Arid (dry, no distinct wet season)	Tropical and subtropical grasslands, savannas and shrublands (tropical and subtropical, semiarid)	Flat	500	Unmanaged, utilized (e.g. fuel wood, Non-Timber Forest Products extraction)		Unmanaged, utilized (e.g. fuel wood, Non-Timber Forest Products extraction)		2000	100	owned by the state but some ownership rights (e.g. access, management, exclusion) are exercised by local communities		State authorities		Yes	No	No	No			Yes	Yes
693	combination	No	No	The villagers faced acute scarcity of timber and important forest products, and realized that unless they protect the patch with modified practices for forest use, then they would face a more critical situation in future.	No	No	Yes	Yes	No	No	No	No	No		Yes	No	No	No	No	No	Yes	No	No	No	Allow safe natural regeneration through protection	India	Odisha	Tropical/subtropical seasonal (wet and dry)	Tropical and subtropical dry broadleaf forests (tropical and subtropical, semihumid)	Hilly	900	Low intensity (close to nature forestry, low impact logging, native species)		High intensity (Timber production oriented approach, few or single species, intensive harvesting operations, planting of trees etc.)		1970	70	owned by the state but some ownership rights (e.g. access, management, exclusion) are exercised by local communities		Local stakeholder communities		No	No	No	No	The condition of granting community ownership in forest under the Forest Rights Act is limited to the traditionally collected non-timber forest products, and not to the timber as a whole. That means the villagers can protect, manage, and develop the forest but can't sell it out or can't give it on lease for timber harvesting.		Yes	No
696	AFM	Yes	Yes	Forest conversion from pure spruce stands to mixed stands	No	No	Yes	No	No	No	Yes	Yes	Yes	Storm risk	No	Yes	No	Yes	No	No	No	Yes	Yes	Yes	Cooperation of marketing to improve the acceptance of forest conversion, especially in private forests	Germany	Allgäu	Boreal	Temperate broadleaf and mixed forests (temperate, humid)	Mountainous	1000	Low intensity (close to nature forestry, low impact logging, native species)		High intensity (Timber production oriented approach, few or single species, intensive harvesting operations, planting of trees etc.)		1980	100	Other	Private, state, communal	Owners		No	Yes	Yes	Yes		legal: Protection forest (storm, erosion) technical: steep slopes, wet, different ownerships economic: steep slopes,limited infrastructure, different ownerships	Yes	No
705	FLR	No	Yes		Yes	No	No	No	No	No	No	No	No		No	No	No	No	No	No	Yes	No	No	No		Venezuela	Andina	Tropical/subtropical seasonal (wet and dry)	Tropical and subtropical coniferous forests (tropical and subtropical, semihumid)	Mountainous	1500	Unmanaged, unutilized (e.g. nature conservation)		Unmanged, unutilized (e.g. nature conservation)				owned and managed by the state / public bodies (or without management)		There is no management		No	Yes	No	No		Declared a protective zone of the city, minimizing burning, it is forbidden to intervene in the area, but little by little the invaders try to penetrate the area.	Yes	No
713	combination	Yes	No		Yes	No	Yes	No	No	Yes	Yes	Yes	No		Yes	Yes	Yes	Yes	Yes	No	Yes	Yes	No	Yes		Serbia	Belgrade	Temperate	Temperate broadleaf and mixed forests (temperate, humid)	Hilly	500	Medium intensity (Combined use approaches with timber production + other management goals like water protection, recreation, erosion control. Mixed forest)		Medium intensity (Combined use approaches with timber production + other management goals like water protection, recreation, erosioncontrol. Mixed forest )				owned and managed by the state / public bodies (or without management)		State authorities		No	Yes	No	No		The project for the application of adaptive measures is in the development phase, so the limitations have not been defined (except for the theoretical approach).	Yes	No
730	A combination of both	Yes	No	desertification, demand for fuel wood	No	No	Yes	Yes	Yes	No	No	No	Yes	shelterbelt forest to protect against sandstorms, desertification, provision of shade, fodder	No	Yes	No	No	Yes	Yes	No	Yes	No	Yes	Establishment of tree plantations in shrublands	Senegal	Kaolack	Tropical/subtropical seasonal (wet and dry)	Tropical and subtropical grasslands, savannas and shrublands (tropical and subtropical, semiarid)	Flat	10	Medium intensity (Combined use approaches with timber production + other management goals like water protection, recreation, erosion control. Mixed forest)		Unmanaged, utilized (e.g. fuel wood, Non-Timber Forest Products extraction)		1975	25	owned and managed by the state / public bodies (or without management)		State authorities		Yes	No	No	No			No	No
737	AFM	Yes	No		No	No	Yes	No	No	No	Yes	No	No		No	Yes	No	Yes	No	No	No	No	No	Yes		Austria		Temperate	Temperate coniferous forests (temperate, humid to semihumid)	Hilly	800	Medium intensity (Combined use approaches with timber production + other management goals like water protection, recreation, erosion control. Mixed forest)		Medium intensity (Combined use approaches with timber production + other management goals like water protection, recreation, erosioncontrol. Mixed forest )		2000	150	owned by individuals / private bodies		Owners		No	Yes	Yes	Yes			Yes	No
740	FLR	No	Yes	Anthropocentric; example: Human pressure on river ecosystem	Yes	No	Yes	Yes	Yes	No	Yes	Yes	Yes		Yes	No	No	No	Yes	Yes	No	Yes	No	No		India	Rispana river Dehradun Uttarakhand	Tropical/subtropical seasonal (wet and dry)	Tropical and subtropical moist broadleaf forests (tropical and subtropical, humid)	Hilly	437m	Unmanaged, unutilized (e.g. nature conservation)		Agroforestry		2015	2018	owned and managed by the state / public bodies (or without management)		State authorities		Yes	No	No	No			No	Yes
751	combination	No	No	Forest degradation by exploitation and agriculture	Yes	No	Yes	Yes	Yes	No	No	Yes	No	Agricultural activities increasingly degraded the forest	Yes	No	No	No	No	No	No	Yes	No	Yes	Forest Protection against degrading activities	Cameroon	Southwest	(Sub-)Tropical wet	Tropical and subtropical moist broadleaf forests (tropical and subtropical, humid)	Hilly	150	Unmanaged, utilized (e.g. fuel wood, Non-Timber Forest Products extraction)		Unmanged, unutilized (e.g. nature conservation)				owned by the state but some ownership rights (e.g. access, management, exclusion) are exercised by local communities		Local stakeholder communities		No	Yes	No	No		The forest is a reserved area for sustainable timber production and biodiversity conservation since British colonial times. Enforcement of the protection is difficult and degradation is ongoing.	Yes	No
755	FLR	No	No	deforestation along rivers	Yes	No	Yes	No	No	Yes	No	Yes	No		Yes	No	No	No	No	No	Yes	No	No	No	Exclusion of cattle by fencing along the river bed for natural succession	Brazil	Mato Grosso	Tropical/subtropical seasonal (wet and dry)	Tropical and subtropical moist broadleaf forests (tropical and subtropical, humid)	Hilly	250	Unmanaged, unutilized (e.g. nature conservation)		Other	Grazing	2005	20	owned by the state but some ownership rights (e.g. access, management, exclusion) are exercised by local communities		There is no management		No	Yes	No	No		Protected as riparian buffer zone	Yes	No
760	combination	No	No	environmental restoration following mining activity	Yes	No	No	Yes	No	No	No	Yes	No	these are new afforestations to restore forest areas eliminated from mining activities	No	Yes	No	No	Yes	No	No	Yes	No	Yes		Italy	Toscana	Temperate	Temperate broadleaf and mixed forests (temperate, humid)	Hilly	150-250	Agroforestry		Agroforestry		1975	100	owned by individuals / private bodies		Owners		No	Yes	Yes	No		Forest replenishment obligations of previously existing stands (about 250) modified by mining activity Hydraulic and refurbishment interventions to check the stability of the landfill material deriving from mining activities and morphological remodeling of the slopes.	Yes	Yes
762	FLR	Yes	No	Water supply problems	Yes	No	Yes	Yes	Yes	No	No	Yes	Yes		Yes	No	No	No	Yes	No	No	Yes	No	Yes		Indonesia	Southwest	Tropical/subtropical seasonal (wet and dry)	Tropical and subtropical moist broadleaf forests (tropical and subtropical, humid)	Mountainous	1100	Unmanaged, utilized (e.g. fuel wood, Non-Timber Forest Products extraction)		Other	Different uses like illegal logging and agriculture	2008	25	owned by the state but some ownership rights (e.g. access, management, exclusion) are exercised by local communities		Local stakeholder communities		Yes	No	No	No			Yes	No
768	combination	Yes	No		Yes	Yes	No	No	Yes	No	No	No	Yes		Yes	No	No	No	No	No	No	No	Yes	No		COSTA RICA	CENTROAMERICA	Tropical/subtropical seasonal (wet and dry)	Tropical and subtropical moist broadleaf forests (tropical and subtropical, humid)	Mountainous	100	Low intensity (close to nature forestry, low impact logging, native species)		High intensity (Timber production oriented approach, few or single species, intensive harvesting operations, planting of trees etc.)		1990	40	owned by individuals / private bodies		Owners		No	Yes	No	No		There is a Board of Trustees and a Board of Trustees, a Rector, a Dean and the faculty or faculty.	Yes	No
770	FLR	Yes	Yes		Yes	No	Yes	Yes	No	No	No	Yes	No		Yes	No	No	No	No	No	No	No	No	No		Ethiopia	South Gonder	Tropical/subtropical seasonal (wet and dry)	Montane grasslands and shrublands (alpine or montane climate)	Mountainous	2200	Unmanaged, utilized (e.g. fuel wood, Non-Timber Forest Products extraction)		Low intensity (close to nature forestry, low impact logging, native species)		1972	11	owned by the state but some ownership rights (e.g. access, management, exclusion) are exercised by local communities		Local stakeholder communities		No	Yes	No	No		it was top down approach on managing the forest/ restored area but due to failure of the government, it has been changed the management and decision making restriction that includes community like bylaws for the conservation and use of natural resource this includes forest	Yes	No
786	combination	Yes	Yes		No	No	Yes	Yes	Yes	Yes	Yes	No	No		Yes	Yes	Yes	No	Yes	Yes	Yes	Yes	Yes	Yes		Ethiopia	Tigray	Arid (dry, no distinct wet season)	Tropical and subtropical coniferous forests (tropical and subtropical, semihumid)	Hilly	2500 m above sea level	Low intensity (close to nature forestry, low impact logging, native species)		Unmanaged, utilized (e.g. fuel wood, Non-Timber Forest Products extraction)		2006	50	owned by the state but some ownership rights (e.g. access, management, exclusion) are exercised by local communities		State authorities		No	Yes	No	No		there is a legal restriction that is legislated by the Federal government or regional government about the Desa'a forest area about how to protect from deforestation means that from anthropogenic disturbance, fire disturbance, and from plantation of exotic invasive species, and protect the area from grazing, cutting for timber and fire wood but also the plantation of necessary plant species, wate…	Yes	No
789	combination	Yes	No		No	No	Yes	No	No	Yes	Yes	No	No		No	Yes	No	Yes	No	No	No	No	Yes	No		Russian Federation	Voronezh region	Arid (dry, no distinct wet season)	Temperate grasslands, savannas and shrublands (temperate, semiarid)	Flat	156 m	Medium intensity (Combined use approaches with timber production + other management goals like water protection, recreation, erosion control. Mixed forest)		High intensity (Timber production oriented approach, few or single species, intensive harvesting operations, planting of trees etc.)		1998		owned and managed by the state / public bodies (or without management)		State authorities		No	Yes	No	Yes		The dynamics of forest cover is constantly decreasing. In 1585 - 31 %, in 2011 - 8 %. In our forest conditions, this rate is too low. This is due to the low efficiency of protection, forest protection, reforestation, as well as species composition.	Yes	No
794	FLR	No	No	Erosion, loss of agricultural productivity	Yes	No	Yes	No	No	No	No	No	Yes	soil conservation for agricultural productivity, erosion control, biodiversity conservation (initially)	Yes	Yes	No	No	Yes	No	No	Yes	No	No		Vietnam	North West	Tropical/subtropical seasonal (wet and dry)	Tropical and subtropical moist broadleaf forests (tropical and subtropical, humid)	Mountainous	1200	Medium intensity (Combined use approaches with timber production + other management goals like water protection, recreation, erosion control. Mixed forest)		Other	Agriculture	2010	50	owned by the state but some ownership rights (e.g. access, management, exclusion) are exercised by local communities		Local stakeholder communities		Yes	No	No	No			Yes	No
797	FLR	No	No	Flooding, Erosion: deforestation of slopes	Yes	No	Yes	No	No	No	No	No	No		Yes	No	No	No	Yes	No	No	No	No	No		China	Hainan Island	Tropical/subtropical seasonal (wet and dry)	Tropical and subtropical dry broadleaf forests (tropical and subtropical, semihumid)	Mountainous	1000	High intensity (Timber production oriented approach, few or single species, intensive harvesting operations, planting of trees etc.)		Other	Agriculture	1990	30	owned by the state but some ownership rights (e.g. access, management, exclusion) are exercised by local communities		State authorities		Yes	No	No	No			No	Yes
798	combination	Yes	No	stop desertification, wind erosion and dust storms	No	No	No	No	No	No	No	No	No	Aforestation (former grass and shrubland)	No	No	No	No	Yes	No	No	Yes	No	No		China	Shaanxi	Arid (dry, no distinct wet season)	Temperate grasslands, savannas and shrublands (temperate, semiarid)	Mountainous	1100	Medium intensity (Combined use approaches with timber production + other management goals like water protection, recreation, erosion control. Mixed forest)		Other	grazing at low densities	1999	100	owned by the state but some ownership rights (e.g. access, management, exclusion) are exercised by local communities		State authorities		No	No	Yes	No		Harsh environmental conditions: arid, wind erosion. Low survival rates of seeds and seedlings	No	Yes
805	FLR	No	No	Degraded grazing land should be restored	Yes	No	Yes	Yes	No	No	No	Yes	No	Pasture productivity was very low	Yes	No	No	No	Yes	No	No	Yes	No	Yes		Colombia	Caribbean	Tropical/subtropical seasonal (wet and dry)	Tropical and subtropical dry broadleaf forests (tropical and subtropical, semihumid)	Hilly	1000	Medium intensity (Combined use approaches with timber production + other management goals like water protection, recreation, erosion control. Mixed forest)		Other	grazing	2010		owned by local communities		Local stakeholder communities		Yes	No	No	No			Yes	No
808	FLR	Yes	Yes	Desertification, drought, famine	Yes	No	Yes	Yes	Yes	No	No	No	No	Tree removal as part of agricultural development led to the loss of ecosystem services that positively impact the agricultural production while prducing fuel, fodder and other goods for local communities	Yes	No	No	No	No	No	No	Yes	No	No	Farmer Managed Natural Regeneration by pruning and promoting selected shoots from live rootstocks	Niger	Maradi	Arid (dry, no distinct wet season)	Tropical and subtropical grasslands, savannas and shrublands (tropical and subtropical, semiarid)	Flat	350	Agroforestry		Other	Agriculture	1985	30	owned by local communities		Owners		Yes	No	No	No			Yes	No
813	FLR	No	No	Restoration of traditional agrosilvipastoral system on degraded agricultural land	Yes	No	Yes	Yes	Yes	No	No	No	No		Yes	No	No	No	No	No	No	No	No	No	Exclusion of grazing: protection from fallow areas from grazing during wet season to establish fodder reserves for dry season	Tanzania	Shinyanga	Tropical/subtropical seasonal (wet and dry)	Tropical and subtropical grasslands, savannas and shrublands (tropical and subtropical, semiarid)	Hilly	1200	Agroforestry		Other	Agriculture	1980	60	Other	Ownership is often undefined. private, communal ownership possible	Local stakeholder communities		No	Yes	No	No	Tenure unknown	Unknown tenure is a problem for protection of fallow areas. Traditional local institutions play important role in protection and enforcement of protection. Ownership titles for privately and communaly owned areas have been established in some areas and play a big role in restoration success	Yes	No
816	FLR	No	No	deforestation	Yes	No	Yes	Yes	No	No	No	Yes	No		Yes	No	No	No	No	No	No	No	No	No	establishment of sustainable management plan and training of stakeholders; Building economic alternatives to forest use	Kenya	Kwale	(Sub-)Tropical wet	Tropical and subtropical moist broadleaf forests (tropical and subtropical, humid)	Hilly	130	Medium intensity (Combined use approaches with timber production + other management goals like water protection, recreation, erosion control. Mixed forest)		Unmanaged, utilized (e.g. fuel wood, Non-Timber Forest Products extraction)		2000		owned by the state but some ownership rights (e.g. access, management, exclusion) are exercised by local communities		Joint management		No	Yes	No	No		Reserve status has impact on management but protection is not enforced and local communities rely on forest utilization	Yes	No
825	FLR	No	No	Coal mine reclamation	Yes	No	No	No	No	No	No	No	No	coal mine reclamation using exotic trees (natural regeneration is very slow)	Yes	No	No	No	Yes	No	No	Yes	No	Yes	Planting a mix of fast growing, nitrogen fixing and soil forming exotic tree species	India	Singrauli	Tropical/subtropical seasonal (wet and dry)	Tropical and subtropical dry broadleaf forests (tropical and subtropical, semihumid)	Hilly	400	Medium intensity (Combined use approaches with timber production + other management goals like water protection, recreation, erosion control. Mixed forest)		Other	coal mining	1990	5	owned by individuals / private bodies		Joint management		Yes	No	No	No			No	No
828	FLR	No	Yes		No	No	No	No	No	No	No	No	No	Abandonment of agriculture	No	No	No	No	No	No	No	No	No	No	Natural regeneration (almost no intervantion)	Puerto Rico	Puerto Rico	(Sub-)Tropical wet	Tropical and subtropical moist broadleaf forests (tropical and subtropical, humid)	Hilly	400	Medium intensity (Combined use approaches with timber production + other management goals like water protection, recreation, erosion control. Mixed forest)		Other	Agriculture: coffee, sugar cane, cattle	1940		owned by individuals / private bodies		Joint management		No	No	Yes	Yes		Low amount of valuable timber species, limited funding for forestry staff, terrain difficulties, species and structural richness as obstacle for common forest operations	Yes	No
833	FLR	No	No	restoration of degraded agricultural lands	Yes	No	Yes	Yes	Yes	No	No	Yes	No	clearing of trees and forest led to degradation and loss in production of agricultural lands	Yes	No	No	No	No	No	Yes	Yes	No	No	Farmer managed natural regeneration, protection of trees from livestock	Uganda	Alebtong	Tropical/subtropical seasonal (wet and dry)	Tropical and subtropical grasslands, savannas and shrublands (tropical and subtropical, semiarid)	Hilly	1000	Agroforestry		Other	Agriculture, livestock			owned by individuals / private bodies		Owners		Yes	No	No	No			Yes	No
849	FLR	No	Yes		Yes	No	Yes	No	No	No	No	Yes	Yes	Forest restoration on abandoned grasslands	Yes	No	No	No	No	No	No	No	No	No	natural succession	Ecuador	Noroeste	Tropical/subtropical seasonal (wet and dry)	Tropical and subtropical moist broadleaf forests (tropical and subtropical, humid)	Mountainous	1500	Unmanaged, unutilized (e.g. nature conservation)		Other	Pasture	1990	40	owned by individuals / private bodies		There is no management		Yes	No	No	No			Yes	No
857	combination	Yes	No	Stormdamage	Yes	Yes	Yes	No	No	No	Yes	Yes	No		No	No	No	No	No	No	No	No	No	Yes	Natural regeneration on parts of the disturbed area	Germany	Baden	Temperate	Temperate broadleaf and mixed forests (temperate, humid)	Hilly	350	Unmanaged, unutilized (e.g. nature conservation)		Medium intensity (Combined use approaches with timber production + other management goals like water protection, recreation, erosioncontrol. Mixed forest )		1999	30	owned by the state but some ownership rights (e.g. access, management, exclusion) are exercised by local communities		State authorities		No	No	Yes	No		It was not technically possible to clear and replant all stands affected by the storm and some stands were left after timber removal for natural regeneration to occur	Yes	No
860	FLR	Yes	Yes	Low fertility of pasture lands	Yes	No	Yes	Yes	Yes	No	No	Yes	Yes		Yes	No	No	No	Yes	Yes	No	Yes	No	No		Nigeria	South	Tropical/subtropical seasonal (wet and dry)	Tropical and subtropical dry broadleaf forests (tropical and subtropical, semihumid)	Hilly	100	Agroforestry		Agroforestry		2010	100	owned by the state but some ownership rights (e.g. access, management, exclusion) are exercised by local communities		Local stakeholder communities		Yes	No	No	No			Yes	No
862	combination	Yes	No	fire risk	Yes	No	Yes	No	No	Yes	Yes	No	Yes		Yes	Yes	Yes	No	No	No	Yes	Yes	Yes	Yes		Spain	Castillaâ€“La Mancha	Tropical/subtropical seasonal (wet and dry)	Mediterranean forests, woodlands and scrub or sclerophyll forests (temperate warm, semihumid to semiarid with winter rainfall)	Hilly	1000	Medium intensity (Combined use approaches with timber production + other management goals like water protection, recreation, erosion control. Mixed forest)		High intensity (Timber production oriented approach, few or single species, intensive harvesting operations, planting of trees etc.)		2010	60	owned and managed by the state / public bodies (or without management)		State authorities		No	No	No	Yes		forest operations like thinning were for a long time too expensive and high tree densities with high risk of fire resulted	Yes	Yes
892	FLR	No	No	afforestation of barren lands	No	Yes	No	Yes	No	No	No	No	No	barren lands should be made usable	No	Yes	No	Yes	No	No	No	Yes	No	No	Plant eucalyptus hybrids; coppice with a short period of rotation	Republic of the Congo	Pointe-Noire	Tropical/subtropical seasonal (wet and dry)	Tropical and subtropical grasslands, savannas and shrublands (tropical and subtropical, semiarid)	Hilly	100	Very intensive management (short rotation, even aged, single species, clear-cut; e.g. plantation forestry)		Unmanged, unutilized (e.g. nature conservation)				owned by individuals / private bodies		Owners		Yes	No	No	No			No	No
893	FLR	No	No	Aforestation of agricultural land with low productivity	Yes	No	Yes	Yes	No	No	No	No	No	Former land use was very poor because of bad soil conditions	Yes	No	No	No	Yes	No	No	Yes	No	No		Philippines	Negros Oriental	Tropical/subtropical seasonal (wet and dry)	Tropical and subtropical dry broadleaf forests (tropical and subtropical, semihumid)	Hilly	300	High intensity (Timber production oriented approach, few or single species, intensive harvesting operations, planting of trees etc.)		Other	Agriculture	1990	40	owned by individuals / private bodies		Owners		Yes	No	No	No			Yes	No
897	FLR	Yes	Yes	poverty reduction and food security in rural areas	Yes	No	Yes	Yes	Yes	No	No	Yes	No		Yes	No	No	No	Yes	No	No	Yes	No	No		Philippines	Central Luzon and other regions of the country	Tropical/subtropical seasonal (wet and dry)	Tropical and subtropical moist broadleaf forests (tropical and subtropical, humid)	Hilly	30 - 1000	Medium intensity (Combined use approaches with timber production + other management goals like water protection, recreation, erosion control. Mixed forest)		Unmanaged, utilized (e.g. fuel wood, Non-Timber Forest Products extraction)		2010	50	owned and managed by the state / public bodies (or without management)		State authorities		No	Yes	Yes	No		National Greening Program supports extensive reforestation activities but planning, implementation and monitoring insufficient to reach management goals. Technical issues are related to insufficient seedling quality and a lack of native seedlings resulting in the planting of badly adapted exotic tree species and high mortality rates.	Yes	No
900	combination	Yes	Yes		No	Yes	Yes	No	No	No	Yes	Yes	Yes		No	Yes	Yes	Yes	Yes	No	No	Yes	No	Yes		Germany	Niedersachsen and Schleswig Holstein	Temperate	Temperate broadleaf and mixed forests (temperate, humid)	Flat	50	Medium intensity (Combined use approaches with timber production + other management goals like water protection, recreation, erosion control. Mixed forest)		High intensity (Timber production oriented approach, few or single species, intensive harvesting operations, planting of trees etc.)		2013	80	owned and managed by the state / public bodies (or without management)		State authorities		No	Yes	No	No		Different rules of nature protection e.g. FFH and certification e.g. FSC need to be considered in management. But this limits the management options in sustainable forestry only to a small degree.	Yes	Yes
935	A combination of both	Yes	Yes	increase income of inhabitants in forest community	No	No	No	No	Yes	No	No	No	Yes		No	No	No	Yes	Yes	No	No	No	No	Yes		China	Hainan Islands	Tropical/subtropical seasonal (wet and dry)	Tropical and subtropical moist broadleaf forests (tropical and subtropical, humid)	Hilly	400-1000	Low intensity (close to nature forestry, low impact logging, native species)		Medium intensity (Combined use approaches with timber production + other management goals like water protection, recreation, erosioncontrol. Mixed forest )		2010	100	owned by the state but some ownership rights (e.g. access, management, exclusion) are exercised by local communities		Joint management		No	No	Yes	Yes		Lack of enough farmland to get foods Weak awareness on FLR for inhabitants; Lack of alternative livelihood sources, which resulte in deforestation to plant rubber trees, areca trees and other crop trees.	Yes	Yes
[truncated: 53 more columns]
