# Supplementary material
Source: MDPI journal article supplement (https://www.mdpi.com/1999-4907/11/9/938)
Supplement: s1 [file s1 › Supplementary_material2_Survey_questions.pdf]

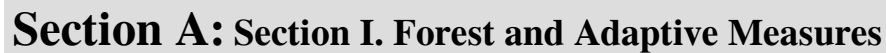

Your answers to these questions will not identify you in any way. Remember, your answers will be kept confidential.

### A1. Adaptive Measures:

**What kind of Adaptive Measure was implemented in the local forest (-landscape) to which your answers apply?**

**Hint: the definitions and examples of Adaptive Measures can be found in the introduction of the survey, you can go to the bottom of this page and press the "Previous" button to get back and recall them. This can be done at any point in the survey without losing any selected answers.**

Adaptive Forest Management

Forest Landscape Restoration

A combination of both

**A2. What was/were the reason(s) for the initiation of the AM?**

**Multiple answers are possible.**

Climate change ☐Societal change ☐

Other, please specify:

Other, please specify:

[illegible]

**A3. Please select conditions at the forest/forest-landscape level which were decisive for the initiation of Adaptive Measures.**

**Multiple answers are possible.**

Degraded forest land should be restored

The forest was, or was likely to become, unprofitable

The forest lost, or was likely to lose, important ecosystem services

The forest lost, or was likely to lose its role in supporting local livelihoods

The forest lost, or was likely to lose its role in providing food security for local communities

5

The forest was increasingly prone to fire

5

The forest was increasingly prone to disease

|  |  |
|--|--|
|  |  |
|--|--|

The forest plays an important role for nature-/biodiversity conservation

7

The societal needs regarding the use of the forest have shifted

9

Other, please specify:

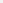

Other, please specify:

[illegible]

**A4. Please select practices that were applied as part of the Adaptive Measures.**

**Multiple answers are possible.**

Restoration of degraded forest lands

7

Forest conversion (e.g. changing tree species composition)

7

Change of the thinning regime

7

### Variation of rotation period

5

Site preparation activities

7

Irrigation ☐

7

Fire Management

7

Specific tree establishment methods (e.g. use of containerized seedlings)

7

Assisting species migration and gene flow of tree species

7

Preserving and increasing (tree) species and provenance diversity (in particular with the inclusion of pioneer and stress-tolerant tree species)

7

Other, please specify:



Other, please specify:

[illegible]

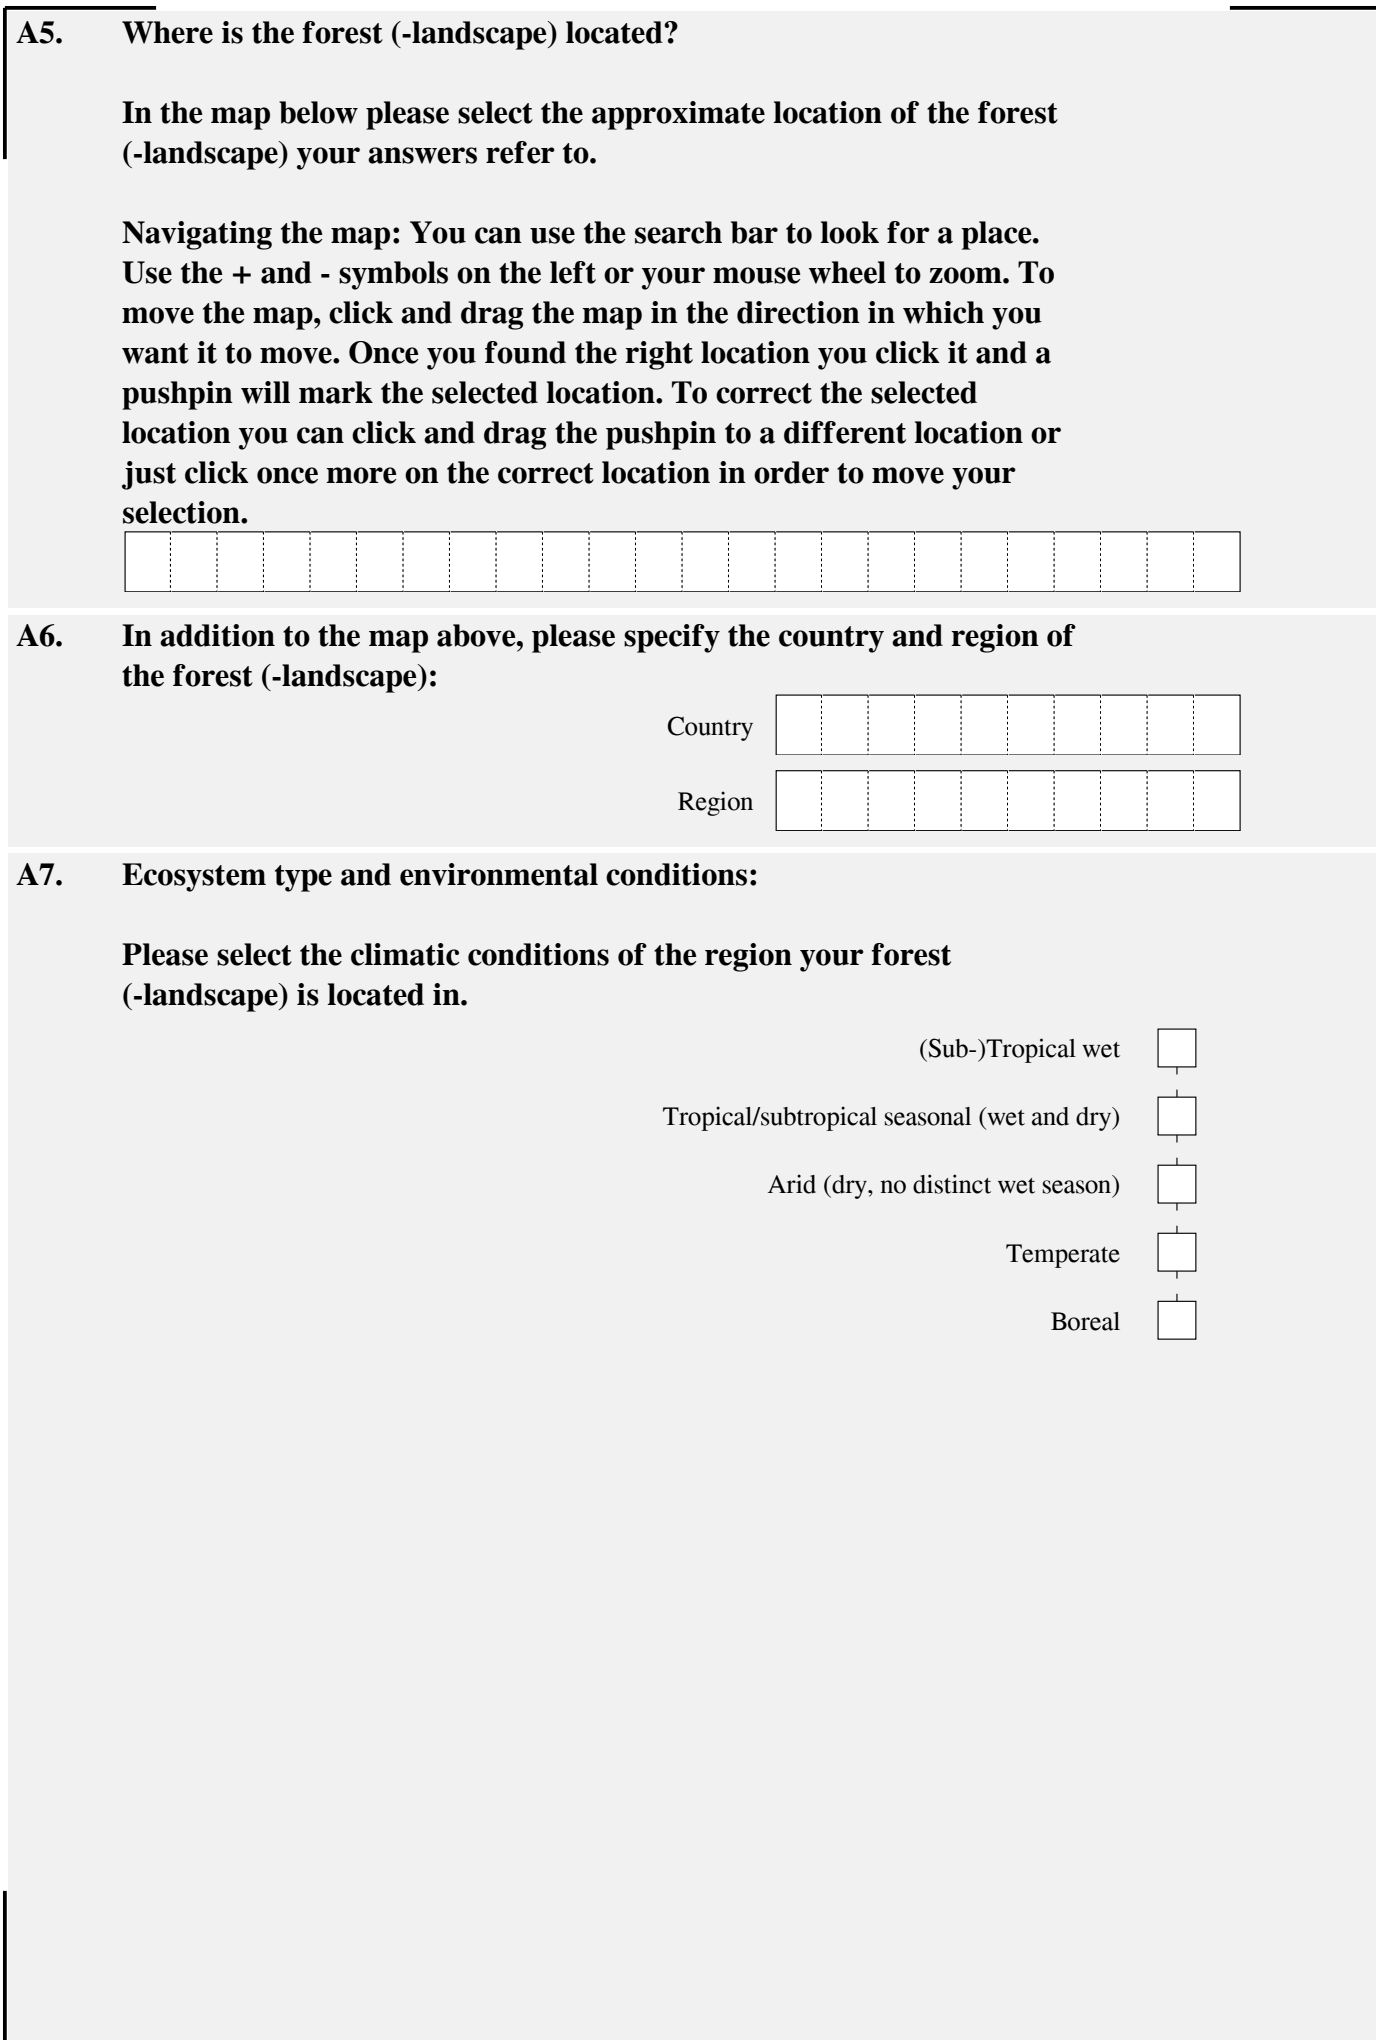

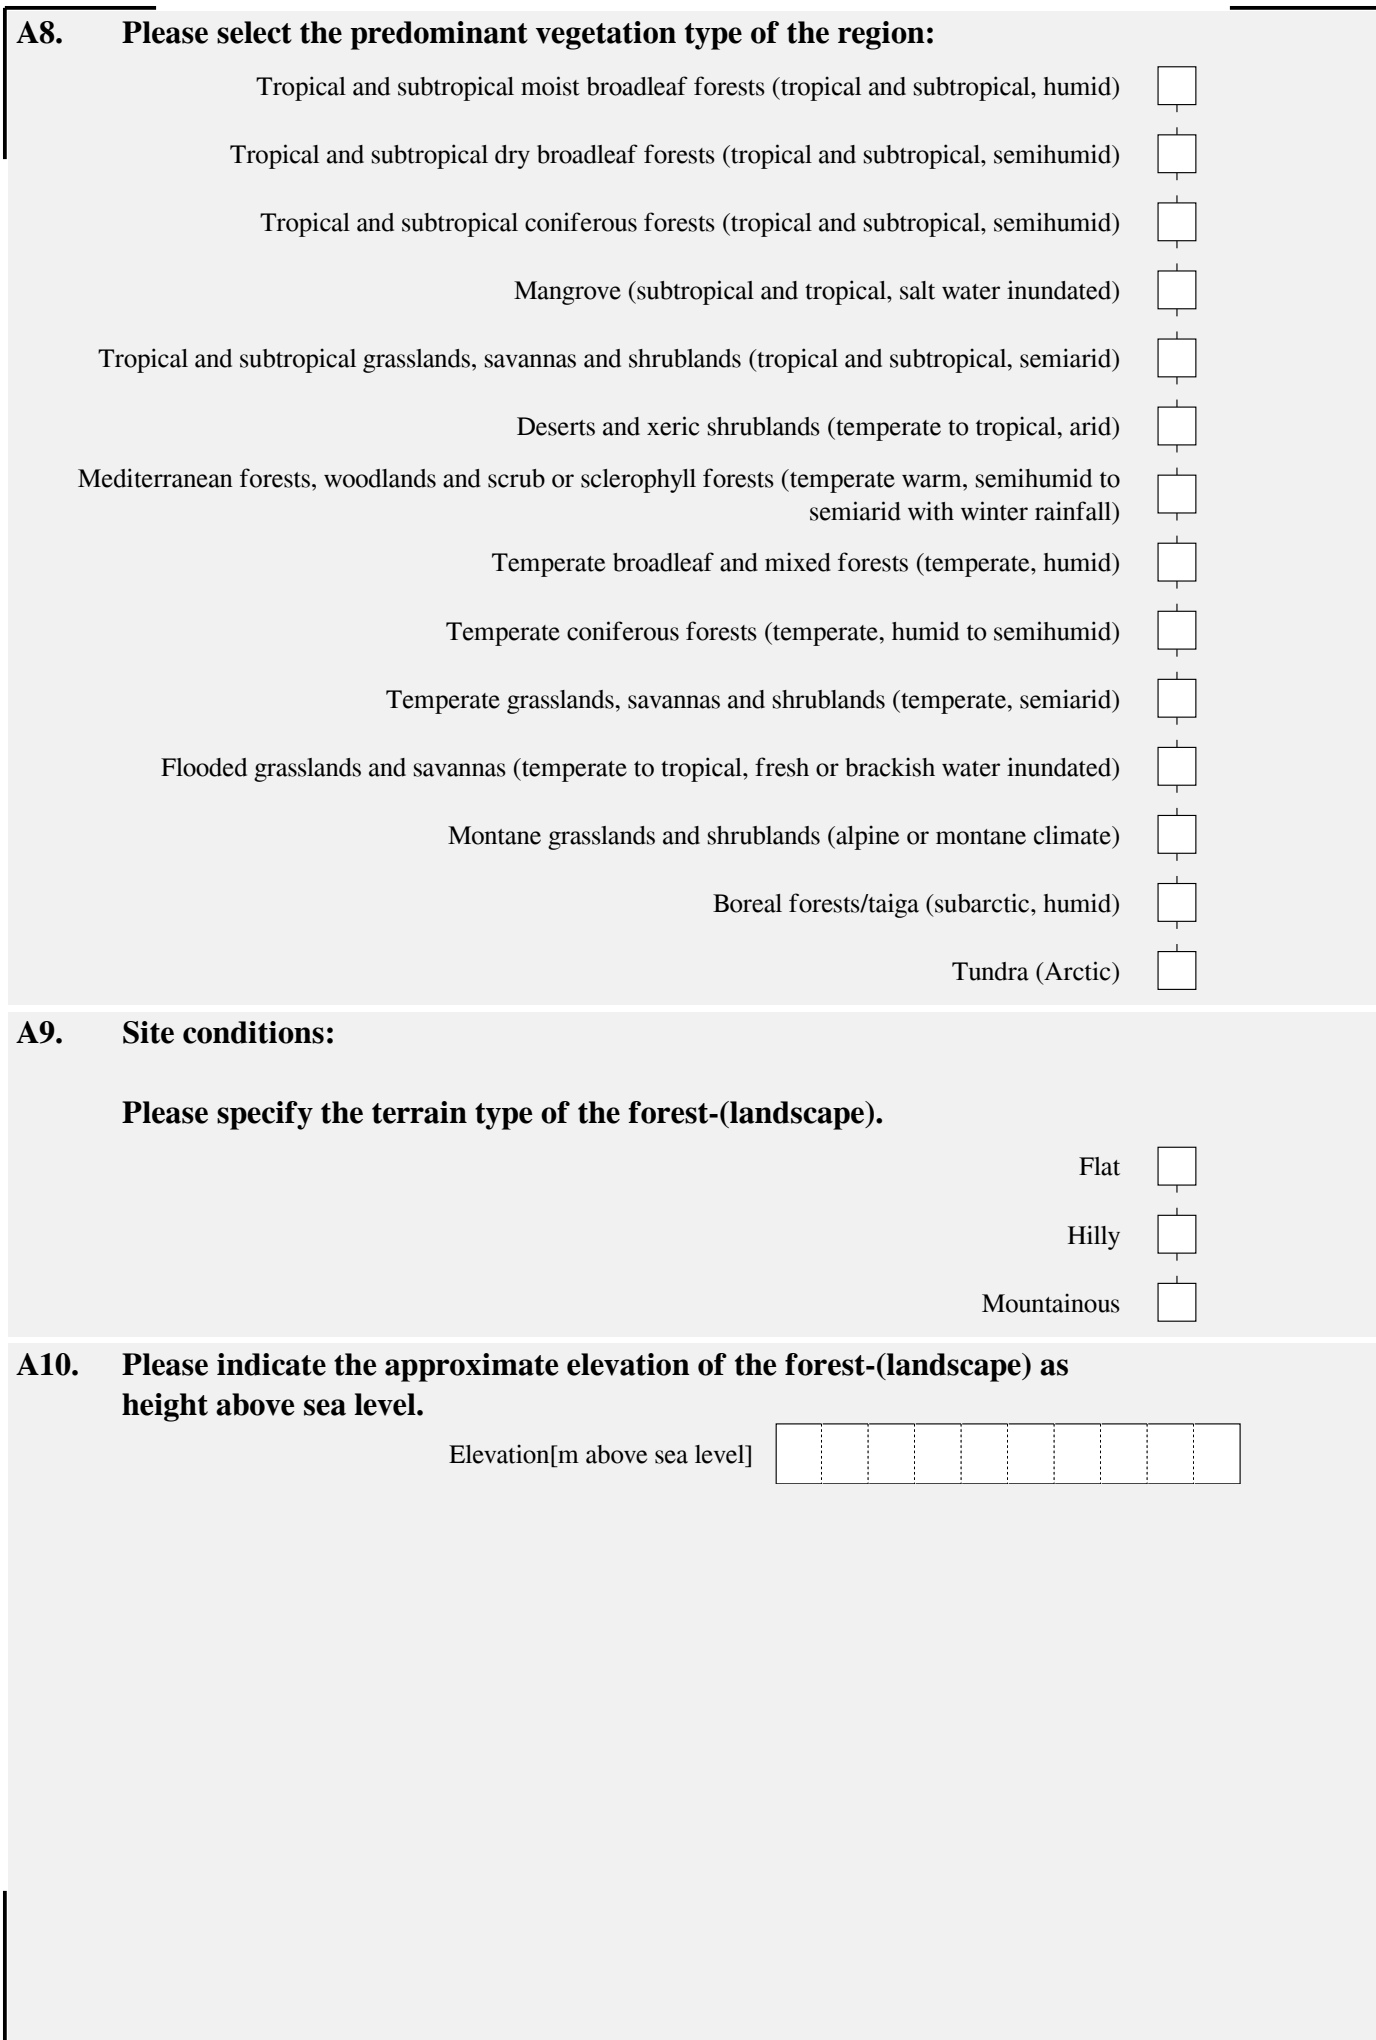

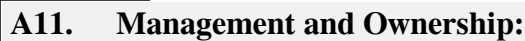

|                                                  |  |
|--------------------------------------------------|--|
| Unmanaged, unutilized (e.g. nature conservation) |  |
|--------------------------------------------------|--|

|                                                                             |  |
|-----------------------------------------------------------------------------|--|
| Unmanaged, utilized (e.g. fuel wood, Non-Timber Forest Products extraction) |  |
|-----------------------------------------------------------------------------|--|

Low intensity (close to nature forestry, low impact logging, native species)

Medium intensity (Combined use approaches with timber production + other management goals like water protection, recreation, erosion control. Mixed forest)

High intensity (Timber production oriented approach, few or single species, intensive harvesting operations, planting of trees etc.) 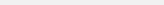

Very intensive management (short rotation, even aged, single species, clear-cut; e.g. plantation forestry)

Agroforestry

Other management, please specify:

Other management, please specify:

[illegible]

**A12. Please select the former/historic management regime applied to the forest (-landscape) with AM.**

|                                                 |  |
|-------------------------------------------------|--|
| Unmanged, unutilized (e.g. nature conservation) |  |
|-------------------------------------------------|--|

|                                                                             |  |
|-----------------------------------------------------------------------------|--|
| Unmanaged, utilized (e.g. fuel wood, Non-Timber Forest Products extraction) |  |
|-----------------------------------------------------------------------------|--|

Low intensity (close to nature forestry, low impact logging, native species)

Medium intensity (Combined use approaches with timber production + other management goals like water protection, recreation, erosion control. Mixed forest ) 

High intensity (Timber production oriented approach, few or single species, intensive harvesting operations, planting of trees etc.) 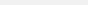

Very intensive management (short rotation, even aged, single species, clearcut; e.g. plantation forestry)

Agroforestry

Other management, please specify:

Other management, please specify:

[illegible]

**A13. Please indicate approximately the year until which the former management was in place and for how long it was in place.**

[illegible][illegible]

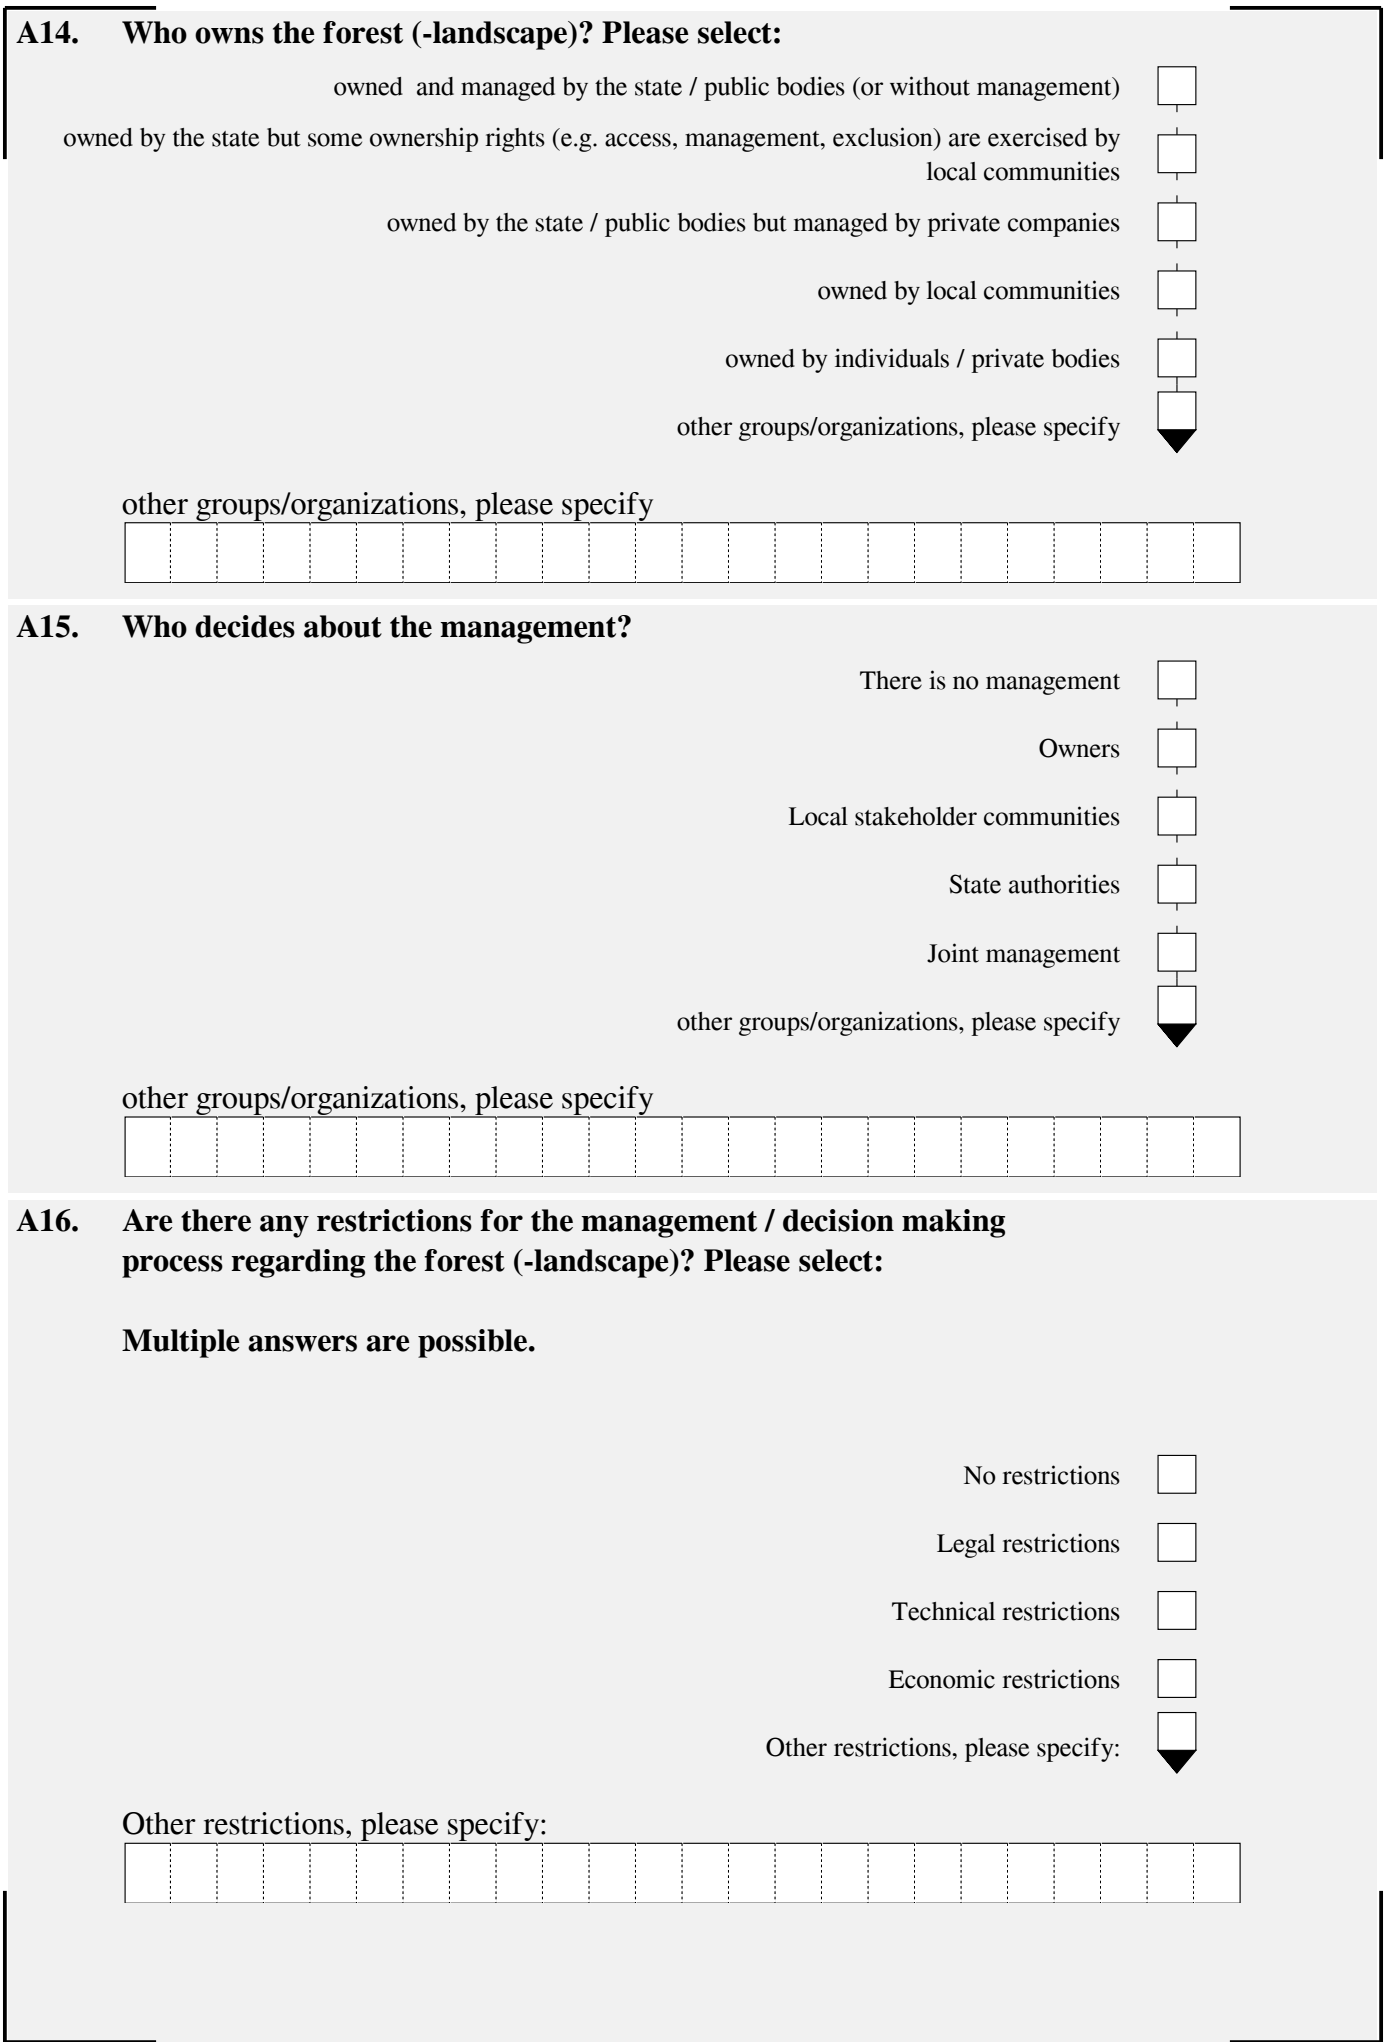

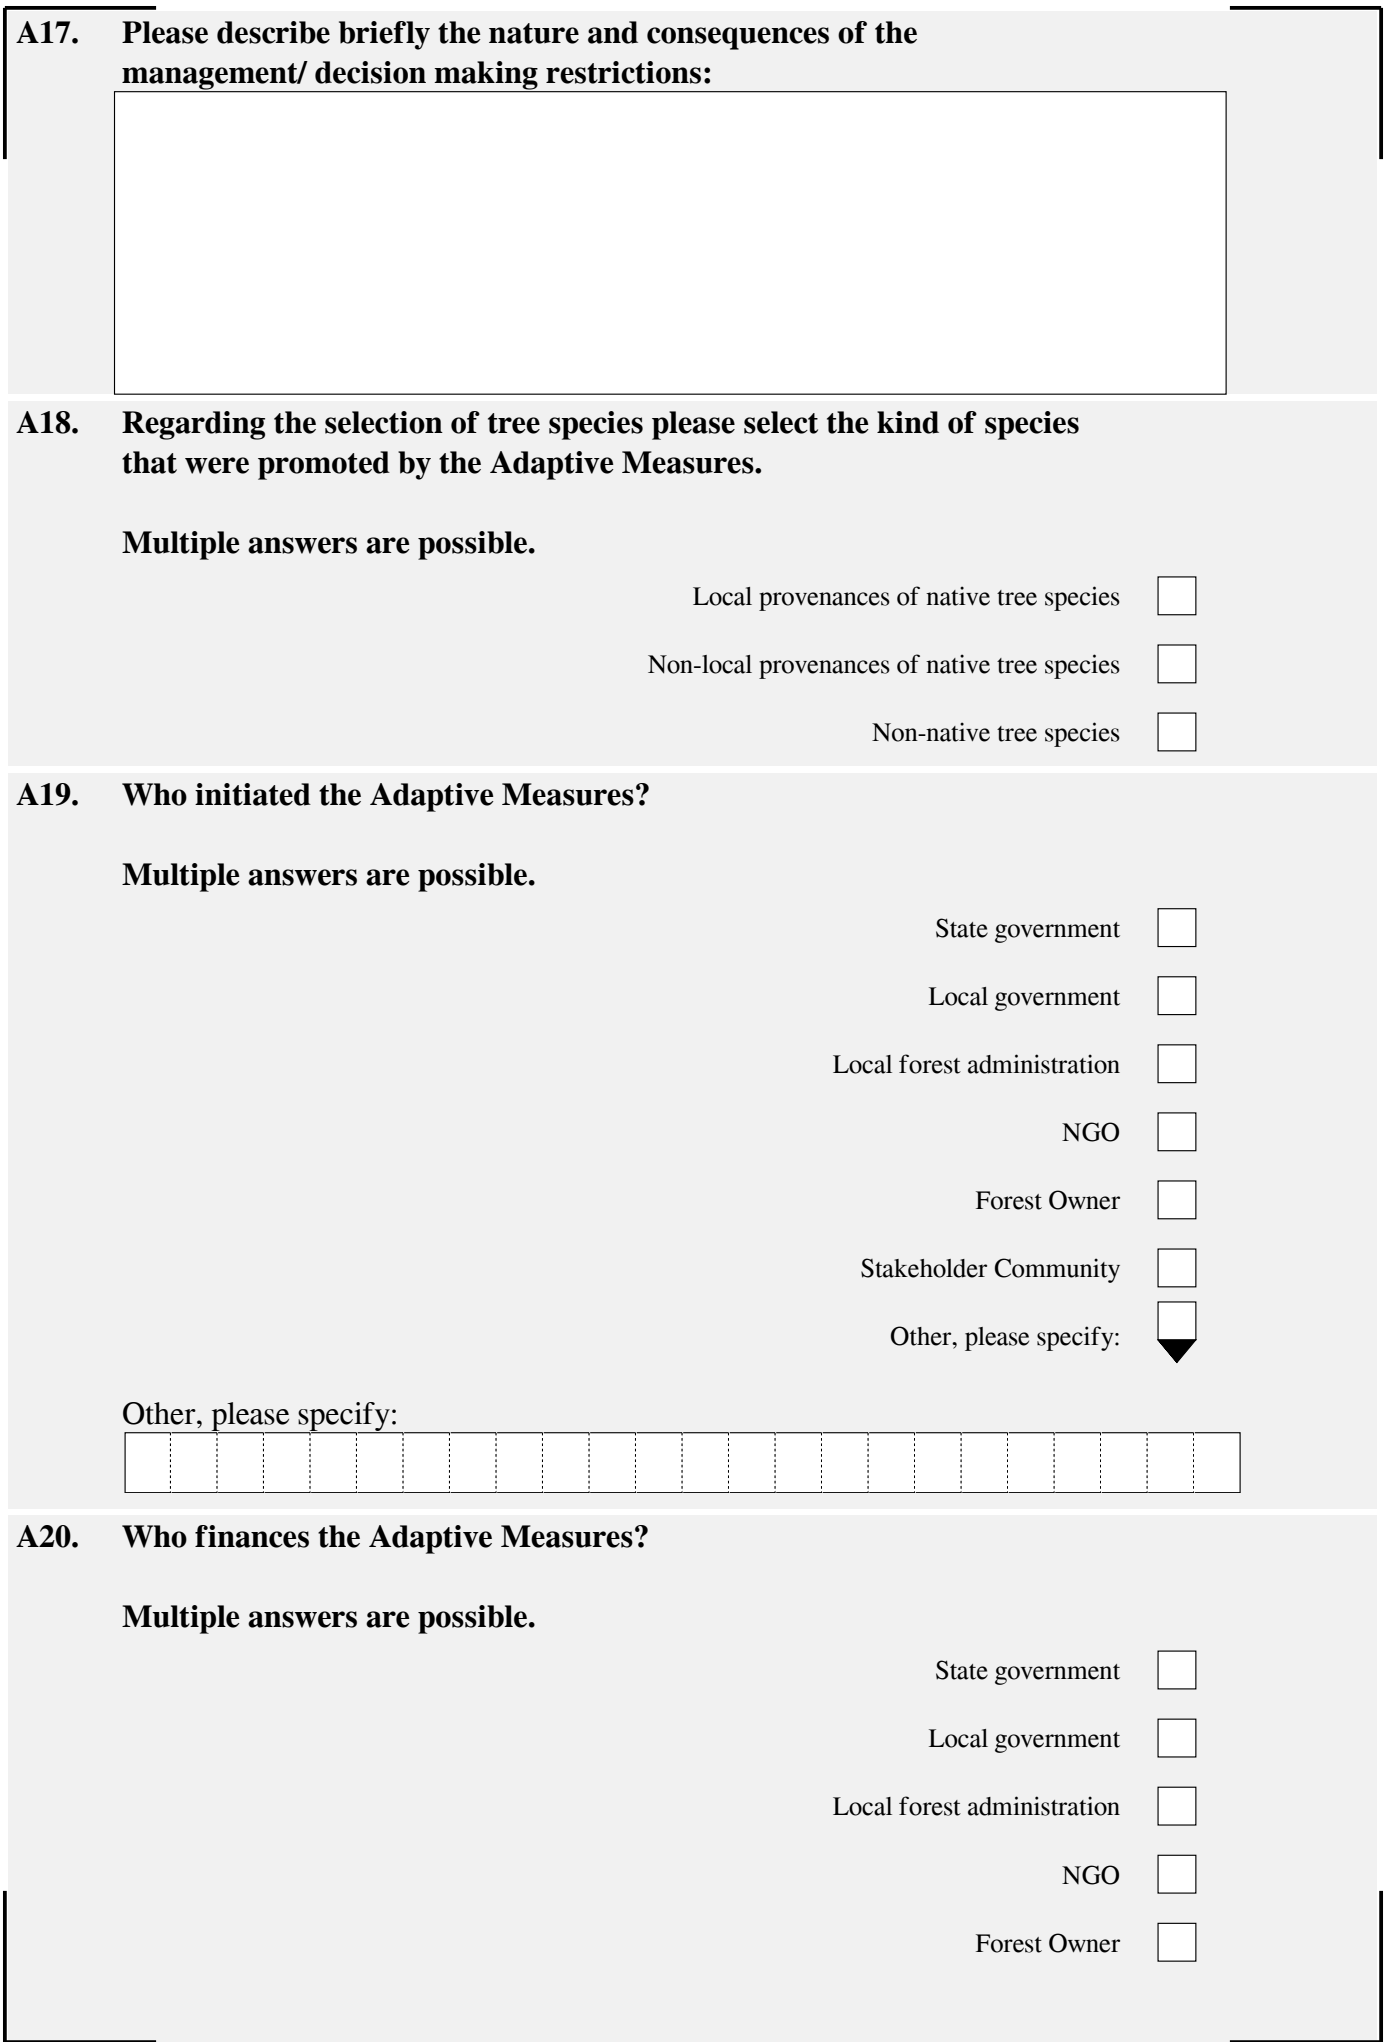



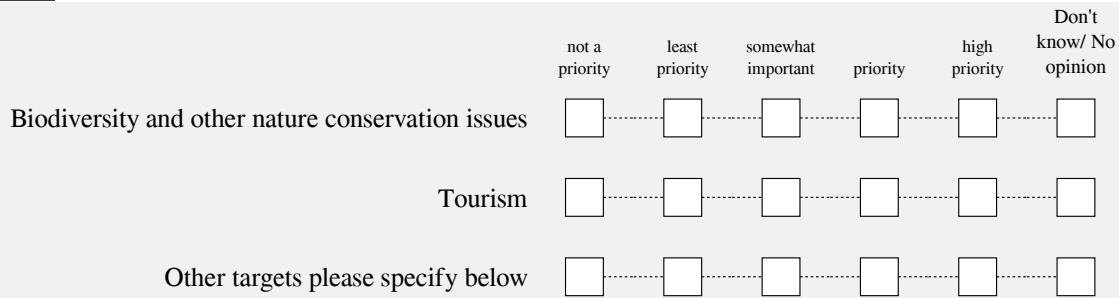

*Note: This question appears because you selected a priority for "other targets" in the last question. You can use the text field above to specify these "other targets"*

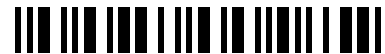

Strongly agree    Mostly agree    Partly agree /disagree    Mostly disagree    Strongly disagree    Don't know/ No opinion

There are trade-offs between AM and ecosystem services, please specify below

☐ ..... ☐ ..... ☐ ..... ☐ ..... ☐ ..... ☐

There are trade-offs between AM and other management targets please specify below

☐ ..... ☐ ..... ☐ ..... ☐ ..... ☐ ..... ☐

**B5. Please specify the trade-offs you see between AM and ecosystem services with regards to the last question:**

*Note: This question appears because you selected a level of agreement for "There are trade-offs between AM and ecosystem services" in the last question, you can use the text field above to specify these trade-offs.*

**B6. Please specify the trade-offs you see between AM and other management targets with regards to the last question:**

*Note: This question appears because you selected a level of agreement for "There are trade-offs between AM and other management targets" in the last question, you can use the text field above to specify these trade-offs.*

**B7. Below you can add comments regarding the success/failure (-factors) that you have selected in the previous question and/or any additional information you would like to share:**



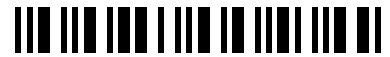

**C5. What is your primary job?**

|                |  |
|----------------|--|
| Administration |  |
|----------------|--|

Management ☐Research ☐

Teaching

Other, please specify: 

Other, please specify: \_\_\_\_\_

[illegible]

**C6. What is your job title?**

[illegible]

**Thank you for your time and support!** You can now close your browser window/tab or visit our website for more information about the task force and our activities.
