# Supplementary material
Source: MDPI journal article supplement (https://www.mdpi.com/1999-4907/11/9/938)

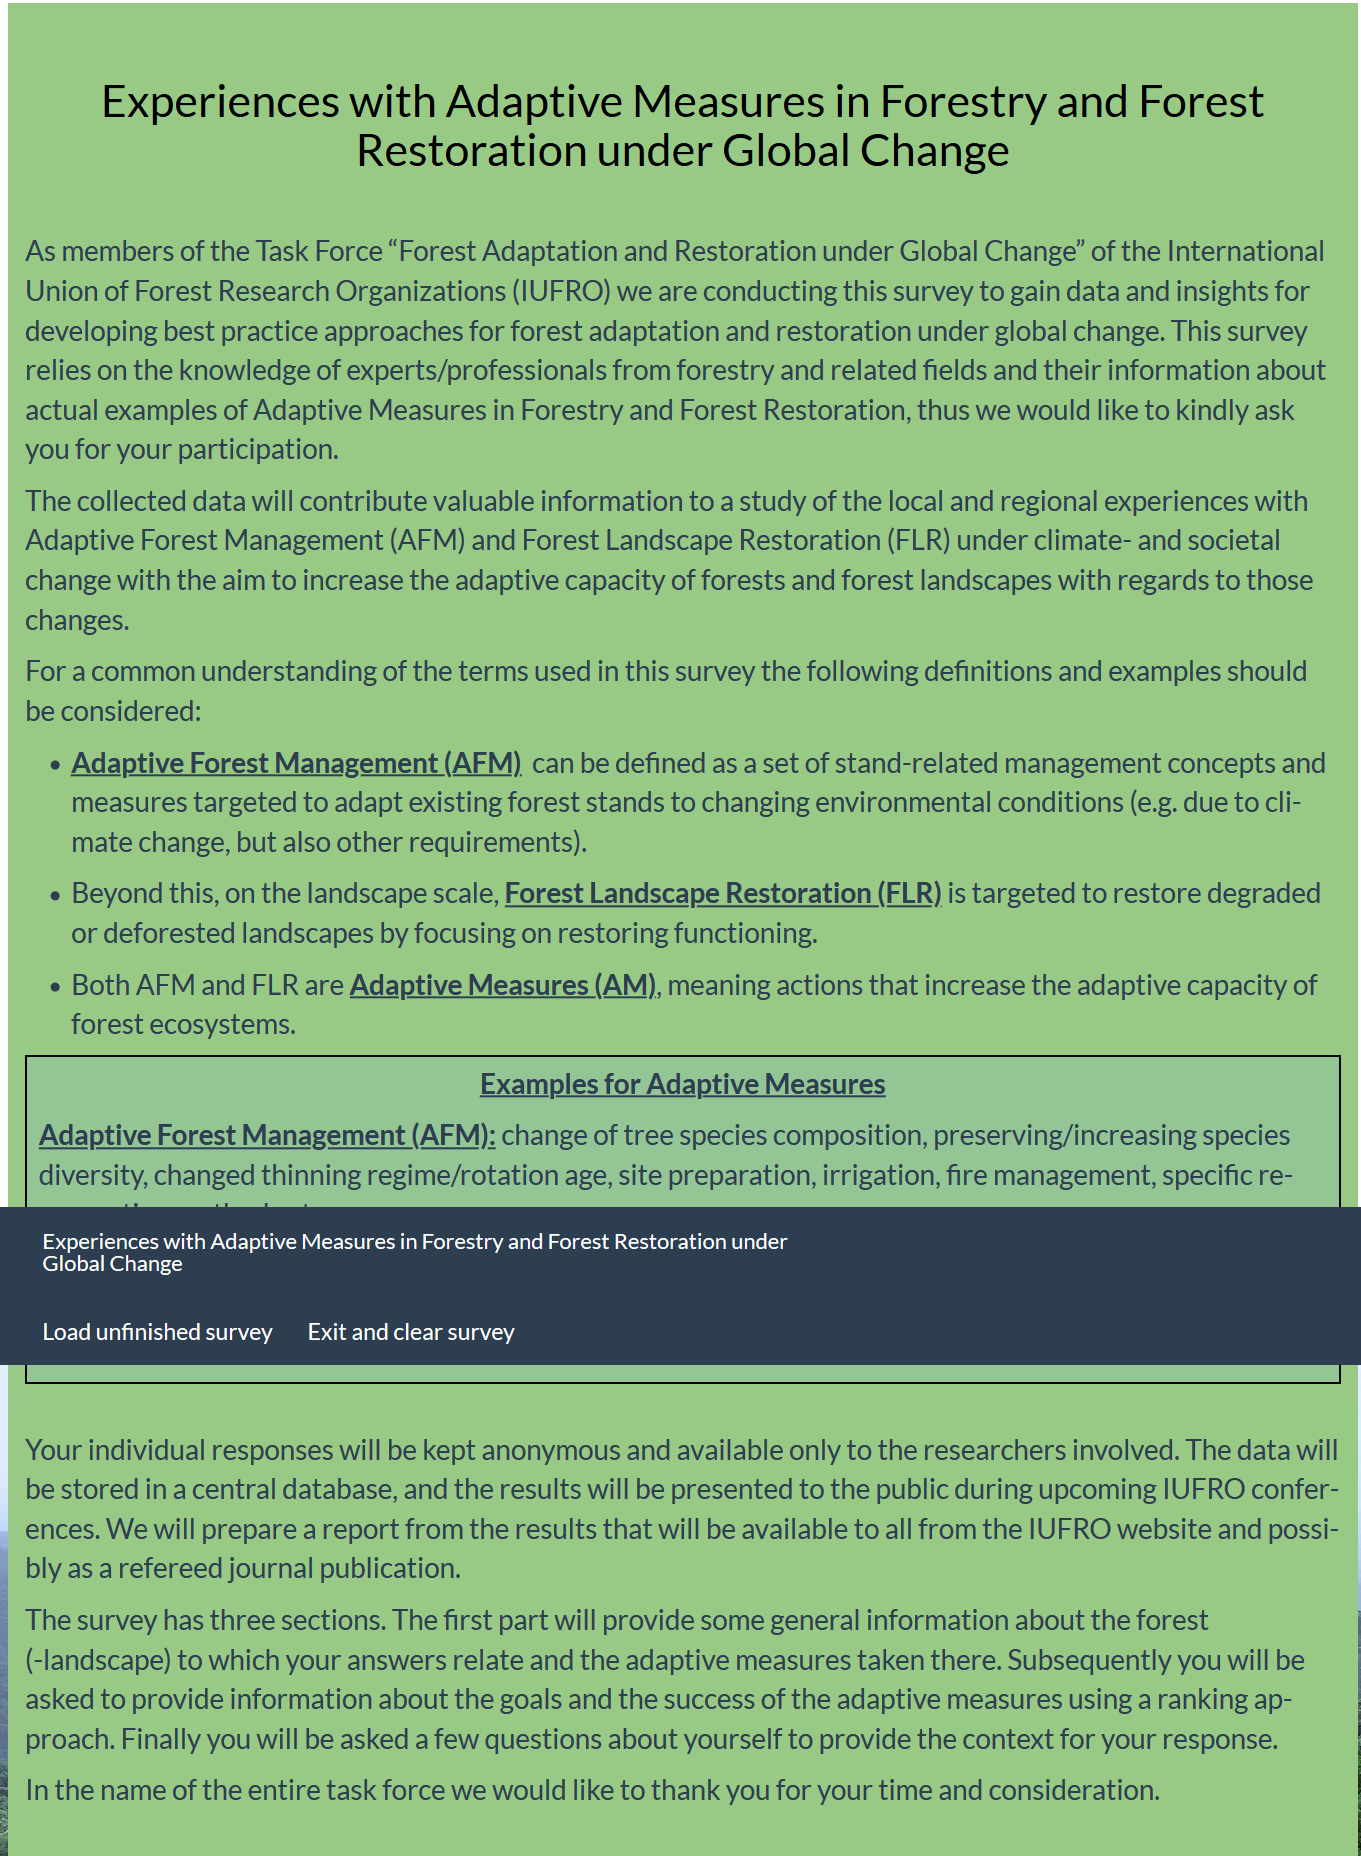

Supplement: s1 [file s1 › Survey_Introductory_page.png]
